# Discharge coefficients for ogee weirs including the effects of a sloping upstream face

Farzin Salmasi and John Abraham

## ABSTRACT

Discharge coefficients ( $C_o$ ) for ogee weirs are essential factors for predicting the discharge-head relationship. The present study investigates three influences on the  $C_o$ : effect of approach depth, weir upstream face slope, and the actual head, which may differ from the design head. This study uses experimental data with multiple non-linear regression techniques and Gene Expression Programming (GEP) models that are applied to introduce practical equations that can be used for design. Results show that the GEP method is superior to the regression analysis for predicting the discharge coefficient. Performance criteria for GEP are  $R^2 = 0.995$ ,  $RMSE = 0.021$  and  $MAE = 0.015$ . Design examples are presented that show that the proposed GEP equation correlates well with the data and eliminates linear interpolation using existing graphs.

**Key words** | discharge coefficient, GEP, ogee weir, regression analysis, upstream face

**Farzin Salmasi** (corresponding author)  
Department of Water Engineering, Faculty of  
Agriculture,  
University of Tabriz,  
P.O. Box: 5166616471, Tabriz,  
Iran  
E-mail: [salmasi@tabrizu.ac.ir](mailto:salmasi@tabrizu.ac.ir)

**John Abraham**  
School of Engineering  
University of St. Thomas, Minnesota,  
2115 Summit Avenue, St. Paul, Minnesota 55105,  
USA

## SYMBOLS

The following symbols are used in this paper:

$C_o$  = discharge coefficient for free (uncontrolled) flow condition with vertical upstream face ( $m^{0.5}/s$ );

$C_i$  = discharge coefficient for free flow condition, with sloping face in upstream ( $m^{0.5}/s$ );

$g$  = acceleration due to gravity;

$H$  = reprehensive horizontal distance in upstream weir slope;

$H_o$  = design head over the crest (m);

$H_e$  = actual head (other than the design head) being considered on the crest (m);

$h_o$  = upstream water depth above the crest in design discharge (m);

$I$  = angle of the upstream face in ogee weir with respect to vertical direction (degrees);

$L$  = effective length of the crest (m);

$Q$  = design discharge for ogee spillway ( $m^3/s$ );

$P$  = ogee spillway height (m);

doi: 10.2166/ws.2020.064

$V$  = reprehensive vertical distance in upstream weir slope;

$V_a$  = approach velocity in m/s  $\left( V_a = \frac{Q}{L(P + H_o)} \right)$

## INTRODUCTION

An ogee spillway is one of the weir types that is used in many dam spillway types like diversion, earth, gravity, rock fill, buttress, and arch dams. It is the most common type and is typically constructed from concrete. Spillways can be located over a conventional gravity dam, an arch gravity dam, and a roller compacted concrete (RCC) dam. If the dam is an embankment, then the spillway can be located over the right or left abutments and is typical made from hard material like concrete.

Flow over an ogee spillway is dependent on the discharge coefficient ( $C_o$ ). These spillways are designed based

on a specific discharge, referred to as the design discharge ( $Q_{design}$ ).

There are two kinds of ogee spillways: (i) – ogee spillway with gates on the crest that can control the discharge over the spillway and (ii) – ogee spillway without gates. These spillways do not have any control of discharge. The advantages of the un-gated or uncontrolled crest are the elimination of the flow control devices and the lower maintenance and repairs.

The shape of the ogee spillway depends upon the head, the inclination of the upstream face of the overflow section, and the height of the overflow section above the floor of the entrance channel (USBR 1987).

The discharge over an uncontrolled overflow ogee crest is given by Equation (1) (Kim & Park 2005):

$$Q = C_0 L H_0^{1.5} \quad (1)$$

where  $Q$  is the design discharge ( $m^3/s$ ),  $C_0$  is the variable discharge coefficient for free (uncontrolled) flow conditions ( $m^{0.5}/s$ ),  $L$  represents the effective length of the crest (m), and  $H_0$  symbolizes the design head or actual head being considered (m), including the velocity of approach head,  $h_a$  (m). In Equation (1),  $C_0 = (2/3)C\sqrt{2g}$  where  $C_0$  is the weir coefficient (dimensionless) and  $g$  is gravity acceleration ( $m/s^2$ ).

The discharge coefficient,  $C_0$ , is influenced by a number of factors. These factors are: the effect of the approach depth, the effect of heads different from the design head, the effect of the upstream face slope, the effect of the downstream apron interference, and the effect of the downstream submergence. Influences of the first three factors are the subject of the present study.

USBR (1987) proposed discharge coefficient graphs for ogee crests with different geometries. These graphs (for gated, ungated and various upstream slope conditions) have been used by hydraulic designers for many years. The gap in knowledge is that there is no simple equation to combine these graphs and thus eliminate linear interpolation among several curves. The objective of present study is to propose an equation for estimating discharge coefficients. For this purpose, multiple regression techniques and Gene Expression Programming (GEP) models are applied with

dimensionless parameters. The experimental data are from USBR (1987). The information for discharge coefficient includes 202 data points, obtained via experiments on several ogee spillways. The discharge coefficient is calculated using Equation (1), i.e.  $C_0 = Q/(LH_0^{1.5})$ .

Another reason for eliminating linear interpolation among several curves relates to Moody's (1947) diagram. Based on this diagram, friction factor ( $f$ ) in pipes depend on two dimensionless parameters: Reynolds number ( $Re$ ) and the relative roughness ( $e/D$ ). Pipe roughness is denoted with  $e$  and pipe diameter is refer with  $D$ . However, the mathematical formulation to find  $f$ , includes an empirical equation that is well-known as the Colebrook-White equation. This equation is such that the  $f$  factor appears on both sides of the equation (Salmasi *et al.* 2012) and requires iteration for its solution

### Effect of approach depth

The approach velocity ( $V_a$ ) for high sharp-crested weirs, is low and the lower nappe from these weirs leads to high contraction. Increasing discharge or reducing weir height causes an increase in  $V_a$  and this phenomenon reduces lower nappe contraction.

For sharp-crested weirs whose heights are more than one-fifth of the total head ( $P/H_0 > 0.2$ ), the discharge coefficient is constant with a value of about 1.82. For weir heights less than about one-fifth the head, the contraction of the flow becomes increasingly suppressed and the crest coefficient decreases. When the weir height becomes zero, the contraction disappears and the overflow weir becomes a channel or a broad-crested-weir, for which the theoretical discharge coefficient is 1.70. Figure 1 shows variation of discharge coefficient for vertical-faced ogee crests with height-over-head ratio ( $P/H_0$ ).

### Effect of the heads on discharge coefficient

Higher discharge than the design discharge causes negative pressure over the spillway bottom. This is because the nappe tends to disconnect from the spillway bottom. Lower discharge than the design discharge causes positive pressure over the spillway bottom. This is because the nappe has a tendency to connect to the spillway bottom. Figure 2

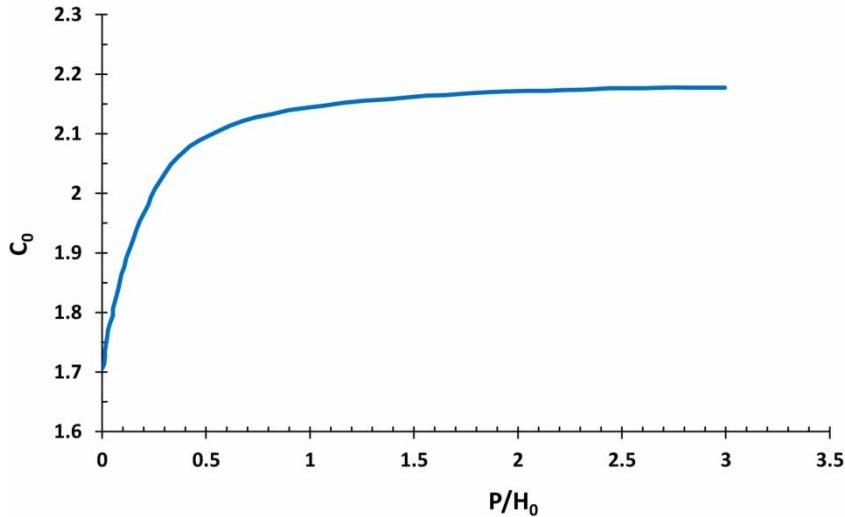

**Figure 1** | Vertical-faced discharge coefficients for ogee crests (USBR 1987). Note: values of  $C_0$  is based on SI system units ( $m^{0.5}/s$ ).

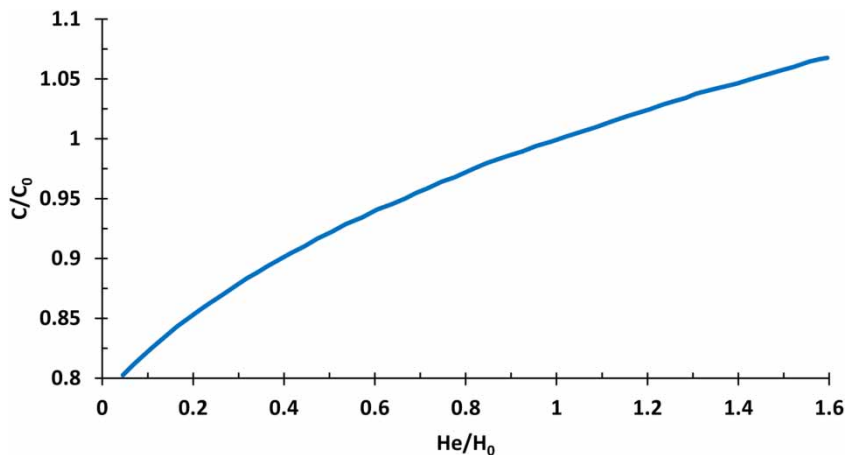

**Figure 2** | Discharge coefficients for other than the design head (USBR 1987).

provides the changes of the dimensionless  $C/C_0$  versus values of  $H_e/H_0$ . The symbol  $H_e$  is the actual head.

### Influence of face slope

With small values of  $P/H_0$ , sloping the upstream face of the ogee spillway increases the discharge coefficient. The effect of upstream slope on discharge coefficient decreases for large ratios of  $P/H_0$ . Figure 3 compares the ogee spillway discharge coefficient with an inclined face ( $C_i$ ) to that for a crest with a non-inclined face ( $C_v$ ) as related to values of  $P/H_0$ .

Figures 4 and 5 show the application of ogee spillways in storage and diversion dams respectively.

Savage & Johnson (2001) carried out a study of flow characteristics over a standard ogee-crested spillway by means of physical and numerical models. Observation of pressure and discharge showed proper agreement between the physical and numerical models. Tullis (2011) evaluated the performance of submerged ogee coefficients as related to upstream and downstream weir height and flow discharge. Results showed that the USBR (1987) dimensionless relationships developed by Bradley (1945) underestimated the effect of submergence ( $S$ ) on  $C_s$  for multiple ogee crest weirs.

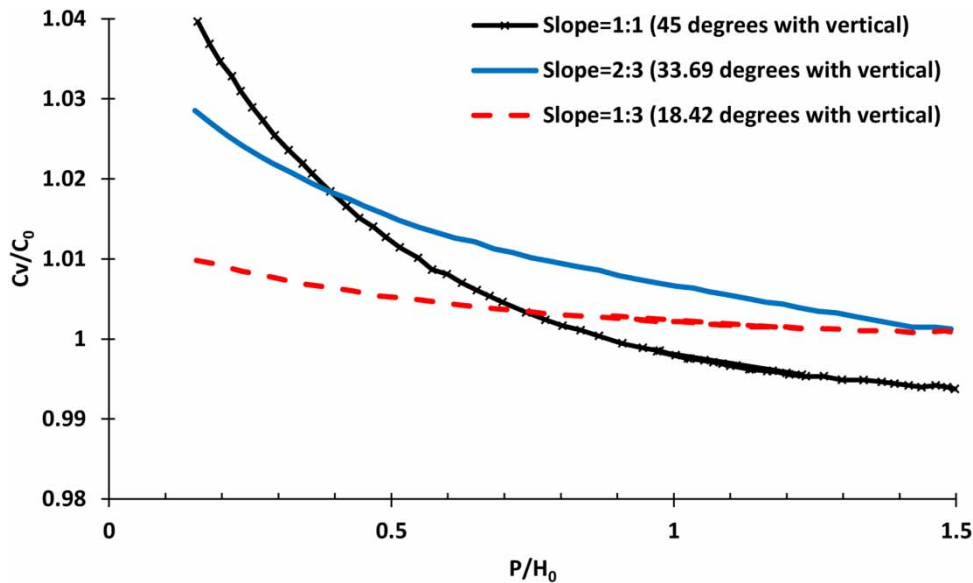

Figure 3 | Discharge coefficients for ogee spillways including a sloping upstream face (USBR 1987).

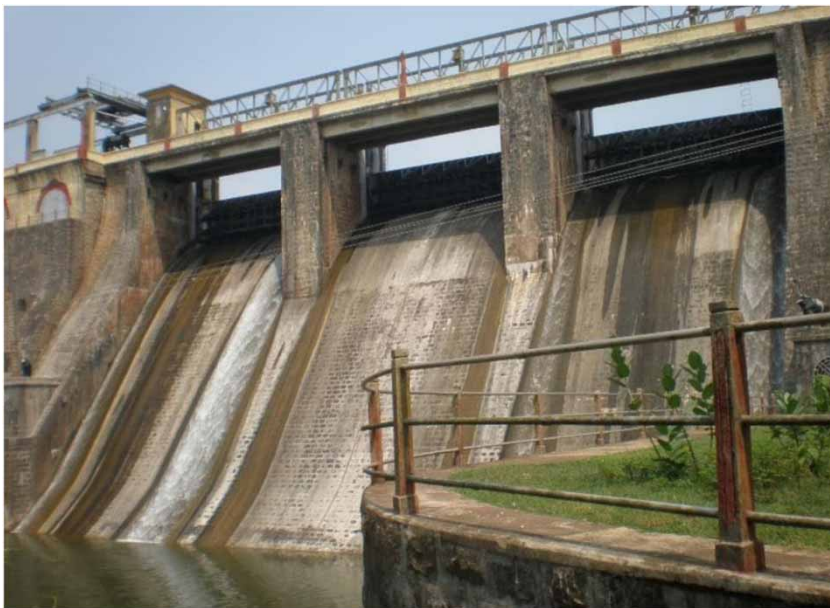

Figure 4 | An ogee spillway in Walayar reservoir, India.

Tullis (2011) reported that the weak relationship between observed and predicted  $C_s$  values might be caused by differences between  $h_d$  measurement positions.

Bradley (1945) measured  $h_d$  nearer to the weir than in the Tullis (2011) study. Tullis & Neilson (2008) showed that

for submergence levels less than 0.70, head-discharge correlations were independent of the tail elevation. On the other hand, for higher submergence, the trends were reversed.

Madadi *et al.* (2014) investigated flow characteristics of a trapezoidal broad-crested weir. The results showed that a

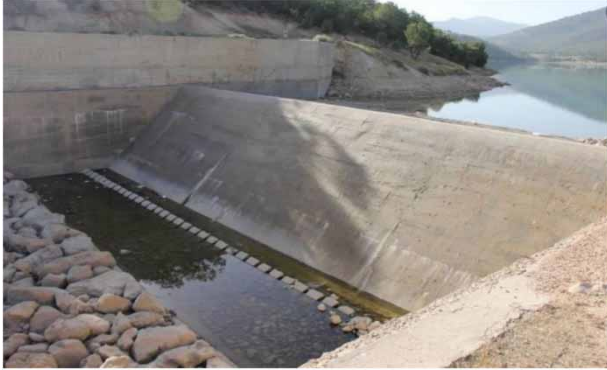

**Figure 5** | An ogee spillway in a diversion dam in Iran.

reduction of the upstream slope avoids the progress of a flow separation zone. A decrease in the upstream slope to  $21^\circ$  resulted in an increase in the discharge coefficient. The changes were as large as 10%. Furthermore, the separation relative length and height decreased up to 80% and 95%, respectively.

Al-Khatib & Gogus (2014) studied discharge in rectangular compound broad-crested weirs using multiple regression equations. In that study, the dependencies of the discharge coefficient and upstream velocity on different operating parameters were investigated based and reported using dimensionless ratios. Results showed when the head in the upstream section is given, the flow discharge can be evaluated with an error of less than  $\sim 5\%$ .

Güven *et al.* (2013) studied flow over broad-crested weirs and through box culverts. The latter's performance was superior for conveying water.

Salmasi (2018) presented equations for estimating discharge coefficients in ogee weirs with consideration of downstream stilling basin elevation and submergence ratio. Salmasi (2018) refers to the ease of these equations compared to traditional charts.

Estimation of discharge coefficient is also important in other hydraulic structures like sluice gates and other weirs. Recent investigations for determining discharge coefficients in radial gates include the study of Salmasi *et al.* (2019), which refers to the effect of sills on discharge. In another study, Salmasi (2019) found the discharge coefficient for circular labyrinth weirs. Akbari *et al.* (2019) predicted discharge coefficients for gated piano key weirs using experimental and artificial intelligence (AI) methods.

Some aspects of the hydrodynamics of rectangular broad-crested porous weirs comprise determination of the discharge coefficient. Flow can occur both through and over these weirs and this phenomenon changes the discharge coefficient values (Mohamed 2010; Salmasi & Abraham 2020).

The goal of this study is to create an accurate method for predicting  $C_o$  for ogee weirs. To introduce the head-discharge relationship, designers need to use Figures 1–3 and employ linear interpolation among the slopes in Figure 3. This approach results in estimations of  $C_o$  and head-discharge relationship with some error. Here, the effects of three factors:  $P/H_o$  ratios, heads that differ from the design head ( $H_e/H_o$ ), and the effect of the upstream face slope ( $I$ ) are investigated using regression analysis and GEP modeling. The goal is to provide a methodology that is independent of design charts provided by USBR (1987). To our best knowledge, there is no equation for predicting  $C_o$  values in ogee weirs with consideration of the three above factors.

## MATERIAL AND METHODS

### Geometric and hydraulic variables

Figure 6 denotes hydraulic parameters in an ogee weir with heads greater/less than the design head. In the figure, the symbol  $El$   $C$  represents crest elevation from an arbitrary datum,  $P$  is ogee weir height,  $H_o$  is design head,  $h_a = V_a^2/2g$  is approach velocity head,  $H_{e1}$  and  $H_{e2}$  are actual heads being considered on the crest, the approach velocity  $V_a$  is equal to  $V_a = Q/L/(P + H_o)$ ,  $L$  is the weir length and  $Q$  is the design discharge. Figure 5 indicates geometric and hydraulic variables in an ogee weir with sloping upstream face. In Figure 7,  $I$  is the upstream face of the weir inclination respect to the vertical direction. In the following equations,  $I$  is in degrees. The other parameters have been defined previously.

### Regression analysis

In this study, the effective parameters are:  $C_o$  versus  $P/H_o$  (effect of depth of approach),  $C/C_o$  versus  $H_e/H_o$  (head differing from the design head) and  $C_i/C_v$  versus  $P/H_o$

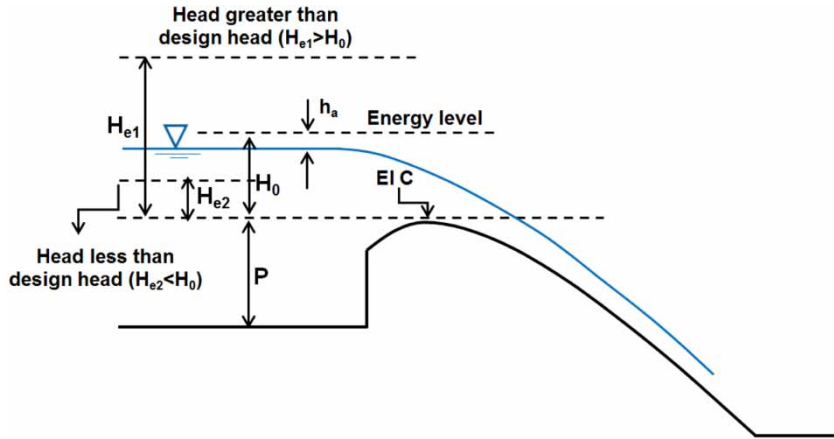

**Figure 6** | Geometric and hydraulic variables in an ogee weir with head greater/less than design head (vertical sloping face).

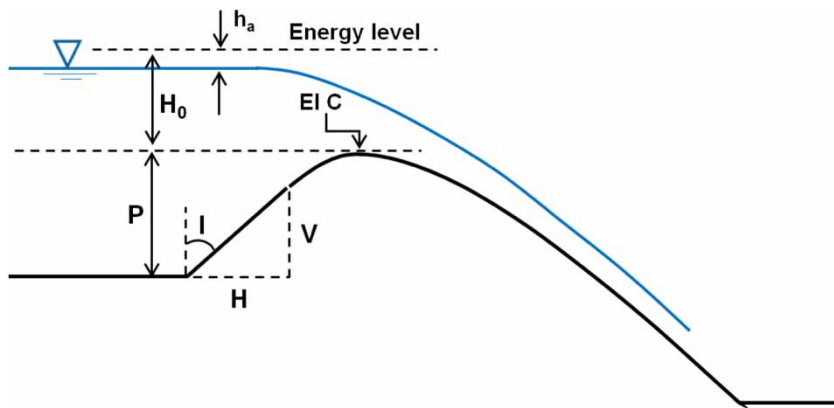

**Figure 7** | Geometric and hydraulic variables in an ogee weir with sloping upstream face in design head.

(upstream sloping face effect). A functional relationship among parameters is described in Equation (2) (USBR 1987):

$$C_0 = f\left(\frac{P}{H_0}, \frac{H_e}{H_0}, I\right) \quad (2)$$

where  $I$  is the weir upstream face inclination with respect to the vertical direction (in degrees) and other parameters were defined previously.

All test data are from different geometries of ogee spillways. The number of data points used in this study is 202 (Appendix I) and the domains of variation for dimensionless parameters in Equation (2) are:  $0 < P/H_0 < 3$ ,  $0 < I < 45$  and  $< 0.05H_e/H_0 < 1.6$ . Thus, different geometries include different values for  $P$  and  $I$  parameters and different hydraulic conditions relate to  $H_0$  and  $H_e$ .

In the present study, a commercially available computer code (SPSS) software version 22 (SPSS 2013) and Curve-Expert Professional (2012) software are used for classical regression analysis.

### Application of GEP

The software GeneXproTools (2011), version 4.0 (Ferreira 2001a, 2001b) was used in this study for prediction of the discharge coefficient.

The GEP considers crossover and mutation operators to be 'winners' (children) and then compete in natural selection. Crossover operations preserve features from one generation to the next. On the other hand, mutations lead to random changes in generations.

## Performance criteria

In this study, to evaluate the accuracy of the proposed models (regression and GEP), the three indicators, (1) root mean square error (RMSE), (2) determination coefficient ( $R^2$ ) and (3) mean absolute error (MAE), are used. They are presented in Equations (3)–(5) (Akbari *et al.* 2019):

### I. Root mean square error (RMSE)

$$RMSE = \sqrt{\frac{\sum_{i=1}^N (y_p - y_0)^2}{N}} \quad (3)$$

### II. Determination coefficient ( $R^2$ )

$$R^2 = 1 - \frac{\sum_{i=1}^N (y_0 - y_p)^2}{\sum_{i=1}^N (y_0 - \bar{y}_0)^2} \quad (4)$$

### III. Mean absolute error (MAE)

$$MAE = \frac{\sum_{i=1}^N |y_0 - y_p|}{N} \quad (5)$$

In these equations,  $N$  represents the number of observations;  $y_0$  symbolizes observed data; the term  $y_p$  represents predicted data;  $\bar{y}_0$  is the value of the mean from the observations; and  $\bar{y}_p$  is the mean of the predictions. As previously noted, the total number of data points are 202, of which 141 (70%) are used for training and 61 (30%) for testing. In Appendix I, these data points are presented.

## RESULTS AND DISCUSSION

### Regression equations

In this study, to derive equations with one dependent variable, CurveExpert Professional (2012) software is used and for equations with two or more dependent variables (multiple regression), SPSS (2013) software and GeneXpro-Tools (2011) software are used. Variation of discharge coefficients ( $C_0$ ) for vertical-faced ogee crest against  $P/H_0$

(Figure 1) are presented in Equation (6) ( $R^2 = 0.999$ ):

$$C_0 = 1.715 + \frac{0.478 \left(\frac{P}{H_0}\right)^{1.258}}{0.113 + \left(\frac{P}{H_0}\right)^{1.258}} \quad (6)$$

Variation of relative discharge coefficients ( $C/C_0$ ) versus a head other than the design head (Figure 2) is obtained from Equation (7) ( $R^2 = 0.999$ ):

$$\frac{C}{C_0} = 0.255 + 0.745 \left(\frac{H_e}{H_0}\right)^{0.176} \quad (7)$$

Variation in discharge for ogee-shaped crests with an upstream slope (Figure 3) are calculated using Equation (8):

$$\frac{C_i}{C_v} = 0.00022(I) + 0.998 \left(\frac{P}{H_0}\right)^{-0.003} \quad (8)$$

Table 1 shows prediction errors for Equations (6)–(8). Equation (8) demonstrates that a non-linear regression equation is not successful in prediction of  $C_0$  with  $R^2 = 0.314$ ,  $RMSE = 1.082$  and  $MAE = 1.075$ . This implies that more sophisticated methods are needed for prediction of  $C_i/C_v$ . Figure 8 presents a scatter plot of training and testing phases based on non-linear regression (Equation (8)).

### Performance of GEP

The GEP model ( $C_i/C_v$  versus  $P/H_0$  and  $I$ ) was applied using different operators defined in Table 2. GEP performs better than regression type analyses, particularly for option 2 in terms of  $R^2$  (0.984),  $RMSE$  (0.002) and  $MAE$  (0.002) in

**Table 1** | Training and testing phase errors for the relative value of the discharge coefficient ( $C_i/C_v$ )

| Type         | Training phase |       |       | Testing phase |       |       |
|--------------|----------------|-------|-------|---------------|-------|-------|
|              | $R^2$          | RMSE  | MAE   | $R^2$         | RMSE  | MAE   |
| Equation (6) | 0.998          | 0.004 | 0.003 | 0.996         | 0.007 | 0.009 |
| Equation (7) | 0.998          | 0.007 | 0.005 | 0.995         | 0.056 | 0.034 |
| Equation (8) | 0.278          | 0.008 | 0.005 | 0.314         | 1.082 | 1.075 |

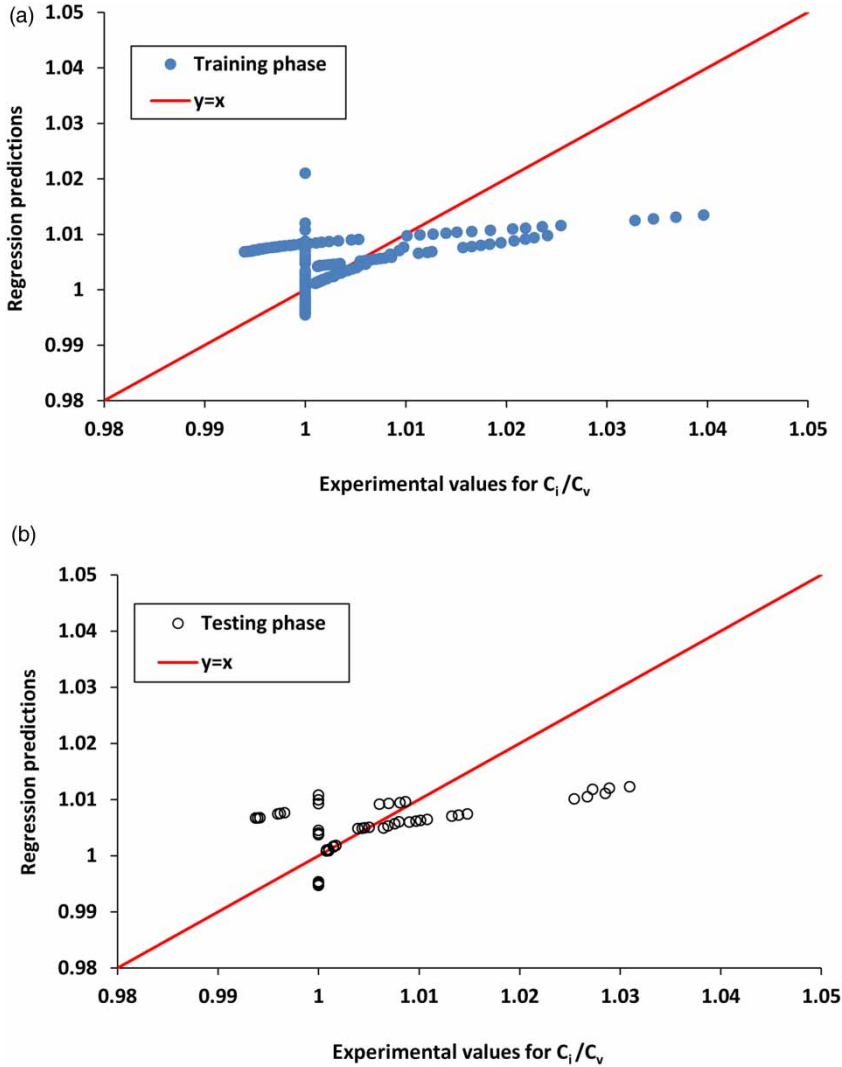

Figure 8 | Scatter plot of training (a) and testing phases (b) based on non-linear regression (Equation (8)).

Table 2 | Errors for the training and testing datasets of the relative discharge coefficient with different GEP operators

| Type     | Operator                                                                                            | Training phase |       |       | Testing phase  |       |       |
|----------|-----------------------------------------------------------------------------------------------------|----------------|-------|-------|----------------|-------|-------|
|          |                                                                                                     | R <sup>2</sup> | RMSE  | MAE   | R <sup>2</sup> | RMSE  | MAE   |
| Option 1 | {+, -, *, /}                                                                                        | 0.884          | 0.005 | 0.004 | 0.925          | 0.005 | 0.004 |
| Option 2 | {+, -, *, /, x <sup>2</sup> , Exp}                                                                  | 0.984          | 0.002 | 0.001 | 0.984          | 0.002 | 0.002 |
| Option 3 | {+, -, *, /, x <sup>2</sup> , x <sup>3</sup> , Exp, cube root}                                      | 0.903          | 0.004 | 0.004 | 0.927          | 0.004 | 0.003 |
| Option 4 | {+, -, *, /, x <sup>2</sup> , x <sup>3</sup> , Exp, cube root, 10 <sup>x</sup> , Natural logarithm} | 0.857          | 0.005 | 0.004 | 0.935          | 0.004 | 0.003 |



the testing phase. The derived equation for option 2 using GEP is:

$$\frac{C_i}{C_v} = 7.387 \left( -18.526 - \frac{P}{H_0} + 1.212 \right) + \frac{\left( 1.902 + \frac{P}{H_0} \right)^2}{-47.671 + 443.797 * I} - \frac{10.670}{2.718 * I * \frac{P}{H_0} * (I - 10.670)} \tag{9}$$

The derived GEP model in Equation (9) offers a high-order nonlinear equation that gives good accuracy with relatively low error. Performance of the GEP method is illustrated in Figure 7. According to Figure 9, GEP is well able to forecast the values of the relative discharge coefficient ( $C_i/C_v$ ).

By combining Equations (6) and (8), a new graph ( $C_0$  versus  $P/H_0$ ) can be obtained with results that are shown in Figure 10. The figure is comprised of four slopes: 45, 33.69, 18.42 and 0 (vertical face) degrees. From Figure 10, it is seen that an inclination of upstream face of ogee weir increases  $C_0$ ; however, the slope effect is small.

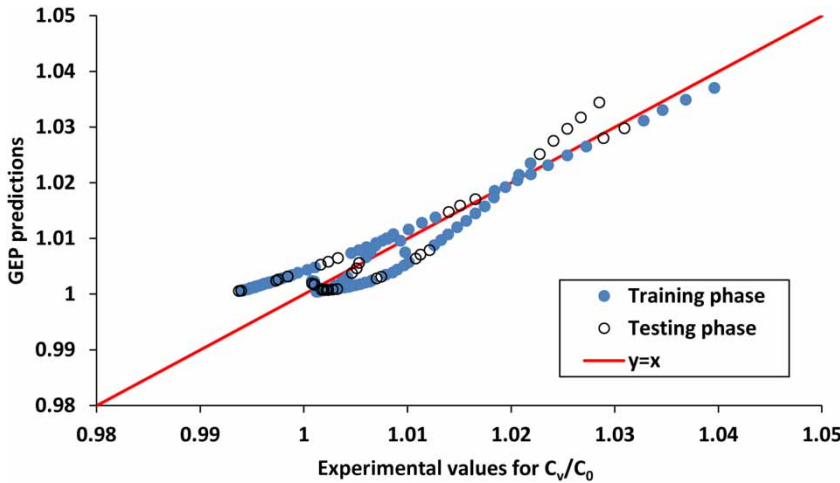

Figure 9 | Scatter plot of training and testing phases based on GEP model (Equation (9)).

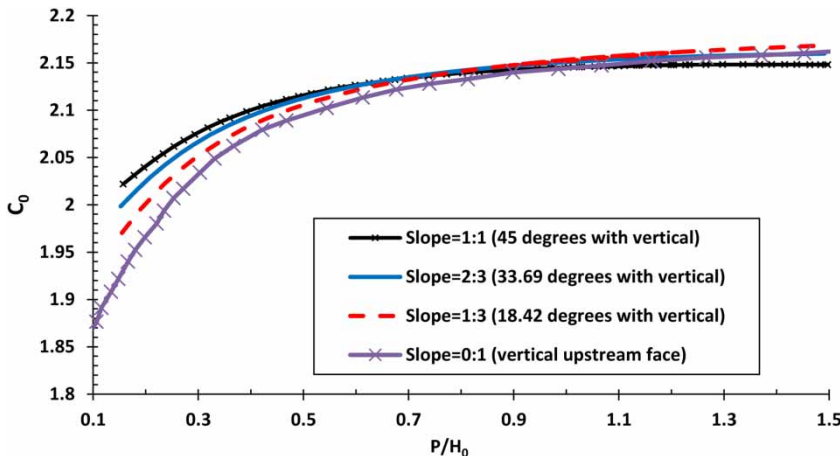

Figure 10 | Variation of discharge coefficient ( $C_0$ ) with the ratio of  $P/H_0$  for four different upstream ogee weir slopes.

### Final equations for predicting $C_0$

#### Regression equation

By applying Equations (6)–(8), two equations for prediction of  $C_0$  were obtained (Equations (12) and (13)). A scatter plot for Equation (11) and errors for both the testing and training data of the discharge coefficient ( $C_0$ ) related with two regression models are presented in Figure 11 and Table 3, respectively. Equation (11) has better performance ( $R^2 = 0.702$ ,  $RMSE = 0.792$  and  $MAE = 0.803$ ).

$$C_0 = 0.001(I) + 2.119 \left(\frac{He}{H0}\right)^{0.128} \left(\frac{P}{H0}\right)^{0.041} \quad (10)$$

**Table 3** | Estimation of the errors for the training and testing datasets of the  $C_0$  with different regression models

| Type          | Training phase |       |       | Testing phase |       |       |
|---------------|----------------|-------|-------|---------------|-------|-------|
|               | $R^2$          | RMSE  | MAE   | $R^2$         | RMSE  | MAE   |
| Equation (10) | 0.602          | 0.992 | 0.959 | 0.587         | 0.410 | 0.705 |
| Equation (11) | 0.724          | 0.784 | 0.959 | 0.702         | 0.792 | 0.803 |

$$C_0 = 0.001(I) + 5.050 \left(\frac{He}{H0}\right)^{0.049} - 2.930 \left(\frac{P}{H0}\right)^{-0.025} \quad (11)$$

#### GEP equation

The results from the GEP analysis for  $C_0$  are given in Equation (12) and prediction errors are given in Table 4.

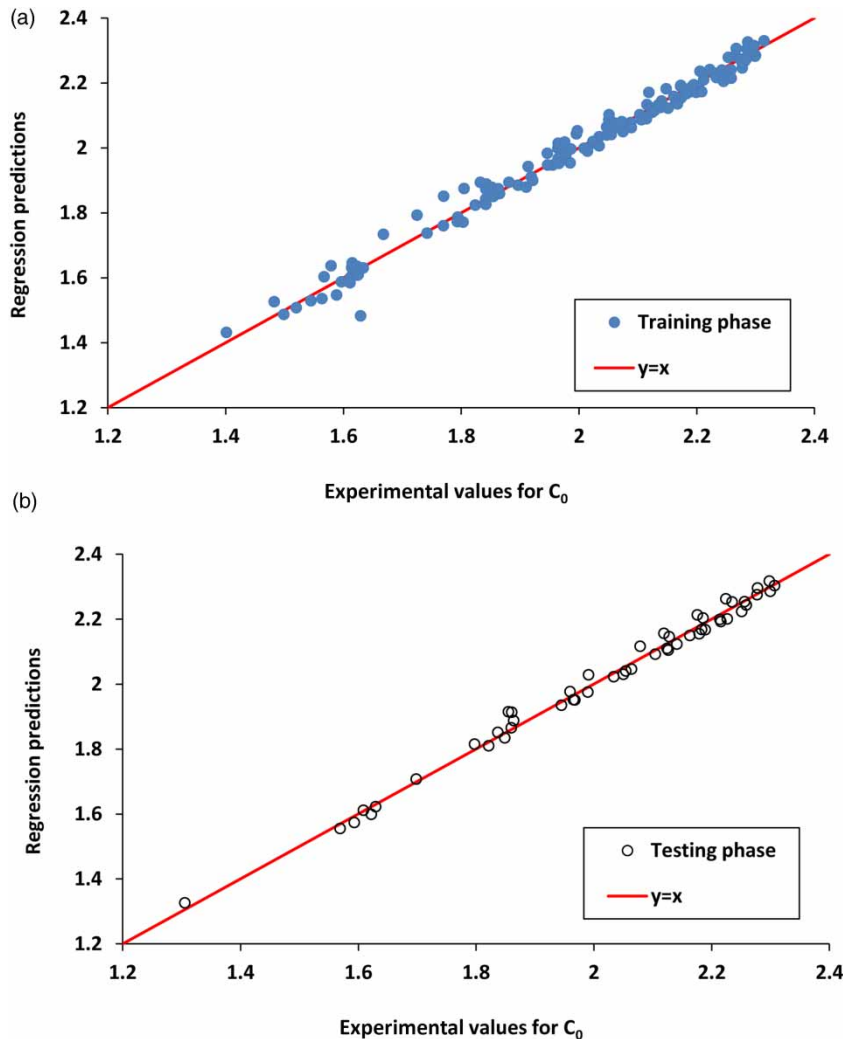

**Figure 11** | Comparison between experimental data and regression model (Equation (10)): (a) training phase, (b) testing phase.

**Table 4** | Estimation of the errors for testing and training of the relative discharge coefficient with different GEP operators

| Type     | Operator                                                                                            | Training phase |       |       | Testing phase  |       |       |
|----------|-----------------------------------------------------------------------------------------------------|----------------|-------|-------|----------------|-------|-------|
|          |                                                                                                     | R <sup>2</sup> | RMSE  | MAE   | R <sup>2</sup> | RMSE  | MAE   |
| Option 1 | {+, -, *, /}                                                                                        | 0.994          | 0.023 | 0.016 | 0.987          | 0.033 | 0.021 |
| Option 2 | {+, -, *, /, x <sup>2</sup> , Exp}                                                                  | 0.989          | 0.032 | 0.027 | 0.985          | 0.035 | 0.028 |
| Option 3 | {+, -, *, /, x <sup>2</sup> , x <sup>3</sup> , Exp, cube root}                                      | 0.998          | 0.016 | 0.012 | 0.995          | 0.021 | 0.015 |
| Option 4 | {+, -, *, /, x <sup>2</sup> , x <sup>3</sup> , Exp, cube root, 10 <sup>x</sup> , Natural logarithm} | 0.978          | 0.047 | 0.042 | 0.977          | 0.047 | 0.040 |

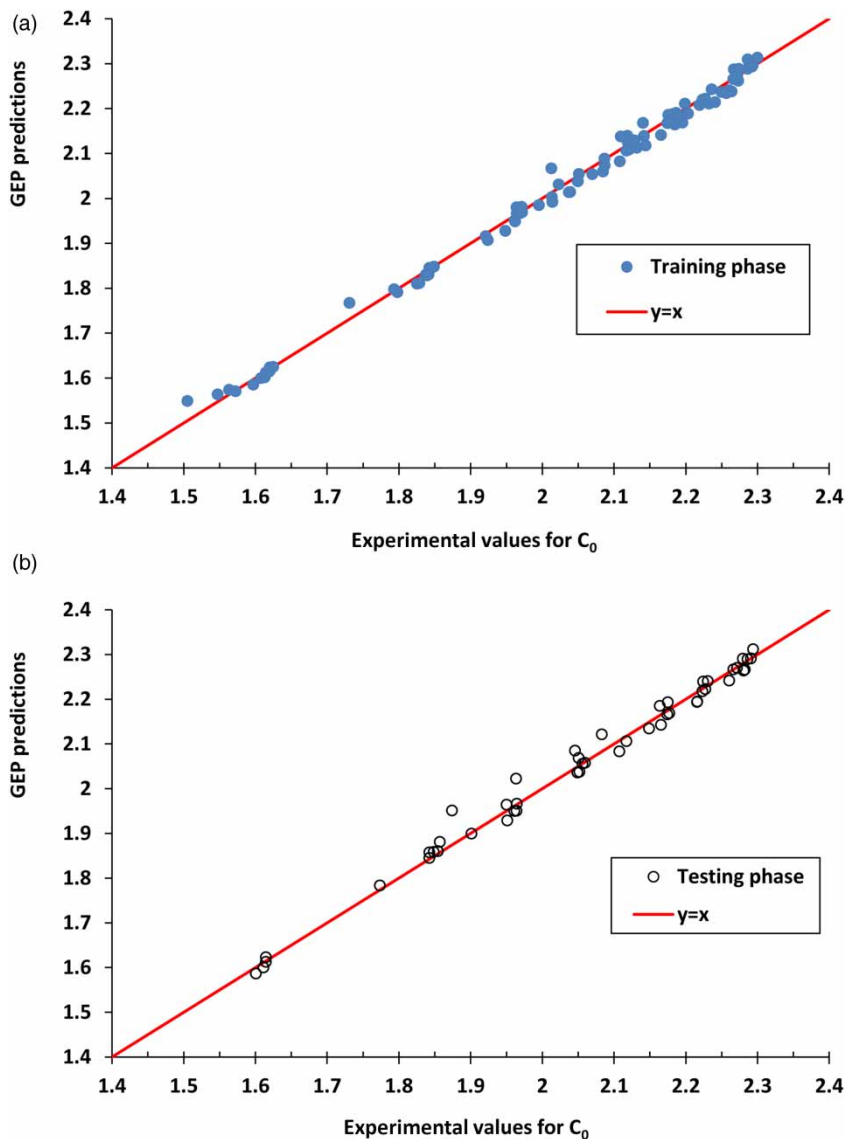**Figure 12** | Comparison between experimental data and GEP, the model (option 3): (a) for the training phase, (b) for the testing phase.

**Table 5** | Prediction of the discharge coefficient for an ogee weir with inclined in upstream face ( $I$ ) and with head ( $H_e$ ) that differs from the design head ( $H_0$ )

| L (m) | P (m) | H <sub>0</sub> (m) | P/H <sub>0</sub> | I (Degrees) | H <sub>e</sub> (m) | H <sub>e</sub> /H <sub>0</sub> | C <sub>0</sub> | Q (m <sup>3</sup> /s) | Q inclined/Q vertical |
|-------|-------|--------------------|------------------|-------------|--------------------|--------------------------------|----------------|-----------------------|-----------------------|
| 10    | 5     | 2                  | 2.5              | 0           | 0.2                | 0.10                           | 1.785          | 1.597                 | 1                     |
| 10    | 5     | 2                  | 2.5              | 0           | 0.4                | 0.20                           | 1.862          | 4.710                 | 1                     |
| 10    | 5     | 2                  | 2.5              | 0           | 0.6                | 0.30                           | 1.932          | 8.980                 | 1                     |
| 10    | 5     | 2                  | 2.5              | 0           | 0.8                | 0.40                           | 1.997          | 14.289                | 1                     |
| 10    | 5     | 2                  | 2.5              | 0           | 1                  | 0.50                           | 2.056          | 20.556                | 1                     |
| 10    | 5     | 2                  | 2.5              | 0           | 1.2                | 0.60                           | 2.108          | 27.715                | 1                     |
| 10    | 5     | 2                  | 2.5              | 0           | 1.4                | 0.70                           | 2.155          | 35.700                | 1                     |
| 10    | 5     | 2                  | 2.5              | 0           | 1.6                | 0.80                           | 2.196          | 44.444                | 1                     |
| 10    | 5     | 2                  | 2.5              | 0           | 1.8                | 0.90                           | 2.231          | 53.874                | 1                     |
| 10    | 5     | 2                  | 2.5              | 0           | 2                  | 1.00                           | 2.260          | 63.917                | 1                     |
| 10    | 5     | 2                  | 2.5              | 0           | 2.2                | 1.10                           | 2.283          | 74.490                | 1                     |
| 10    | 5     | 2                  | 2.5              | 0           | 2.4                | 1.20                           | 2.300          | 85.509                | 1                     |
| 10    | 5     | 2                  | 2.5              | 0           | 2.6                | 1.30                           | 2.311          | 96.882                | 1                     |
| 10    | 5     | 2                  | 2.5              | 0           | 2.8                | 1.40                           | 2.316          | 108.513               | 1                     |
| 10    | 5     | 2                  | 2.5              | 0           | 3                  | 1.50                           | 2.315          | 120.301               | 1                     |
| 10    | 5     | 2                  | 2.5              | 0           | 3.2                | 1.60                           | 2.308          | 132.142               | 1                     |
| 10    | 5     | 2                  | 2.5              | 25          | 0.2                | 0.10                           | 1.790          | 1.601                 | 1.003                 |
| 10    | 5     | 2                  | 2.5              | 25          | 0.4                | 0.20                           | 1.872          | 4.735                 | 1.005                 |
| 10    | 5     | 2                  | 2.5              | 25          | 0.6                | 0.30                           | 1.948          | 9.051                 | 1.008                 |
| 10    | 5     | 2                  | 2.5              | 25          | 0.8                | 0.40                           | 2.017          | 14.435                | 1.010                 |
| 10    | 5     | 2                  | 2.5              | 25          | 1                  | 0.50                           | 2.081          | 20.811                | 1.012                 |
| 10    | 5     | 2                  | 2.5              | 25          | 1.2                | 0.60                           | 2.139          | 28.117                | 1.015                 |
| 10    | 5     | 2                  | 2.5              | 25          | 1.4                | 0.70                           | 2.191          | 36.291                | 1.017                 |
| 10    | 5     | 2                  | 2.5              | 25          | 1.6                | 0.80                           | 2.237          | 45.269                | 1.019                 |
| 10    | 5     | 2                  | 2.5              | 25          | 1.8                | 0.90                           | 2.277          | 54.983                | 1.021                 |
| 10    | 5     | 2                  | 2.5              | 25          | 2                  | 1.00                           | 2.311          | 65.359                | 1.023                 |
| 10    | 5     | 2                  | 2.5              | 25          | 2.2                | 1.10                           | 2.339          | 76.320                | 1.025                 |
| 10    | 5     | 2                  | 2.5              | 25          | 2.4                | 1.20                           | 2.361          | 87.784                | 1.027                 |
| 10    | 5     | 2                  | 2.5              | 25          | 2.6                | 1.30                           | 2.377          | 99.660                | 1.029                 |
| 10    | 5     | 2                  | 2.5              | 25          | 2.8                | 1.40                           | 2.387          | 111.857               | 1.031                 |
| 10    | 5     | 2                  | 2.5              | 25          | 3                  | 1.50                           | 2.392          | 124.275               | 1.033                 |
| 10    | 5     | 2                  | 2.5              | 25          | 3.2                | 1.60                           | 2.390          | 136.811               | 1.035                 |
| 10    | 5     | 2                  | 2.5              | 45          | 0.2                | 0.10                           | 1.794          | 1.605                 | 1.005                 |
| 10    | 5     | 2                  | 2.5              | 45          | 0.4                | 0.20                           | 1.880          | 4.757                 | 1.010                 |
| 10    | 5     | 2                  | 2.5              | 45          | 0.6                | 0.30                           | 1.960          | 9.111                 | 1.015                 |
| 10    | 5     | 2                  | 2.5              | 45          | 0.8                | 0.40                           | 2.034          | 14.557                | 1.019                 |
| 10    | 5     | 2                  | 2.5              | 45          | 1                  | 0.50                           | 2.102          | 21.024                | 1.023                 |
| 10    | 5     | 2                  | 2.5              | 45          | 1.2                | 0.60                           | 2.165          | 28.454                | 1.027                 |
| 10    | 5     | 2                  | 2.5              | 45          | 1.4                | 0.70                           | 2.221          | 36.786                | 1.030                 |
| 10    | 5     | 2                  | 2.5              | 45          | 1.6                | 0.80                           | 2.271          | 45.961                | 1.034                 |

*(continued)*

Table 5 | continued

| L (m) | P (m) | H <sub>0</sub> (m) | P/H <sub>0</sub> | I (Degrees) | H <sub>e</sub> (m) | H <sub>e</sub> /H <sub>0</sub> | C <sub>0</sub> | Q (m <sup>3</sup> /s) | Q inclined/Q vertical |
|-------|-------|--------------------|------------------|-------------|--------------------|--------------------------------|----------------|-----------------------|-----------------------|
| 10    | 5     | 2                  | 2.5              | 45          | 1.8                | 0.90                           | 2.315          | 55.911                | 1.038                 |
| 10    | 5     | 2                  | 2.5              | 45          | 2                  | 1.00                           | 2.354          | 66.567                | 1.041                 |
| 10    | 5     | 2                  | 2.5              | 45          | 2.2                | 1.10                           | 2.386          | 77.854                | 1.045                 |
| 10    | 5     | 2                  | 2.5              | 45          | 2.4                | 1.20                           | 2.412          | 89.689                | 1.049                 |
| 10    | 5     | 2                  | 2.5              | 45          | 2.6                | 1.30                           | 2.433          | 101.988               | 1.053                 |
| 10    | 5     | 2                  | 2.5              | 45          | 2.8                | 1.40                           | 2.447          | 114.659               | 1.057                 |
| 10    | 5     | 2                  | 2.5              | 45          | 3                  | 1.50                           | 2.456          | 127.605               | 1.061                 |
| 10    | 5     | 2                  | 2.5              | 45          | 3.2                | 1.60                           | 2.458          | 140.724               | 1.065                 |
| 10    | 5     | 2                  | 2.5              | 60          | 0.2                | 0.10                           | 1.798          | 1.608                 | 1.007                 |
| 10    | 5     | 2                  | 2.5              | 60          | 0.4                | 0.20                           | 1.887          | 4.774                 | 1.014                 |
| 10    | 5     | 2                  | 2.5              | 60          | 0.6                | 0.30                           | 1.970          | 9.157                 | 1.020                 |
| 10    | 5     | 2                  | 2.5              | 60          | 0.8                | 0.40                           | 2.048          | 14.652                | 1.025                 |
| 10    | 5     | 2                  | 2.5              | 60          | 1                  | 0.50                           | 2.119          | 21.190                | 1.031                 |
| 10    | 5     | 2                  | 2.5              | 60          | 1.2                | 0.60                           | 2.184          | 28.716                | 1.036                 |
| 10    | 5     | 2                  | 2.5              | 60          | 1.4                | 0.70                           | 2.244          | 37.171                | 1.041                 |
| 10    | 5     | 2                  | 2.5              | 60          | 1.6                | 0.80                           | 2.298          | 46.498                | 1.046                 |
| 10    | 5     | 2                  | 2.5              | 60          | 1.8                | 0.90                           | 2.345          | 56.633                | 1.051                 |
| 10    | 5     | 2                  | 2.5              | 60          | 2                  | 1.00                           | 2.387          | 67.507                | 1.056                 |
| 10    | 5     | 2                  | 2.5              | 60          | 2.2                | 1.10                           | 2.422          | 79.046                | 1.061                 |
| 10    | 5     | 2                  | 2.5              | 60          | 2.4                | 1.20                           | 2.452          | 91.171                | 1.066                 |
| 10    | 5     | 2                  | 2.5              | 60          | 2.6                | 1.30                           | 2.476          | 103.798               | 1.071                 |
| 10    | 5     | 2                  | 2.5              | 60          | 2.8                | 1.40                           | 2.494          | 116.837               | 1.077                 |
| 10    | 5     | 2                  | 2.5              | 60          | 3                  | 1.50                           | 2.506          | 130.193               | 1.082                 |
| 10    | 5     | 2                  | 2.5              | 60          | 3.2                | 1.60                           | 2.511          | 143.765               | 1.088                 |

The performance errors from the preferred GEP were:  $R^2 = 0.995$ ,  $RMSE = 0.021$  and  $MAE = 0.015$  for the testing phase.

Figure 12 shows comparison between experimental data and the GEP model (option 3) for training and testing phases.

$$C_0 = \frac{I + 2\left(\frac{P}{H_0}\right) + 1.697}{697.362 * 10^{P/H_0}} + \frac{\frac{P}{H_0}}{-3.705\left(\frac{He}{H_0}\right) - \frac{I + 2.161}{P/H_0}} + \frac{I - 4.453}{I - 5.002 + e^{-7.140}} \quad (12)$$

### Application example

To demonstrate a practical application of the discussed method, it is used to calculate the discharge coefficient ( $C_0$ ) of an ogee weir due to the existence of an upstream sloping face and a discharge over it that differs from the design discharge with the following characteristics:

The design discharge for the weir (with a vertical face) is 63.917 m<sup>3</sup>/s. The overflow dam spillway height is 5 m. The length of the overflow spillway is 10 m and the design head is 2 m. The upstream face of the weir is inclined at 0, 25, 45 and 60 degrees. The values of  $C_0$  are computed using Equation (12) and  $Q$  is computed with Equation (1). The results are presented in Table 5.

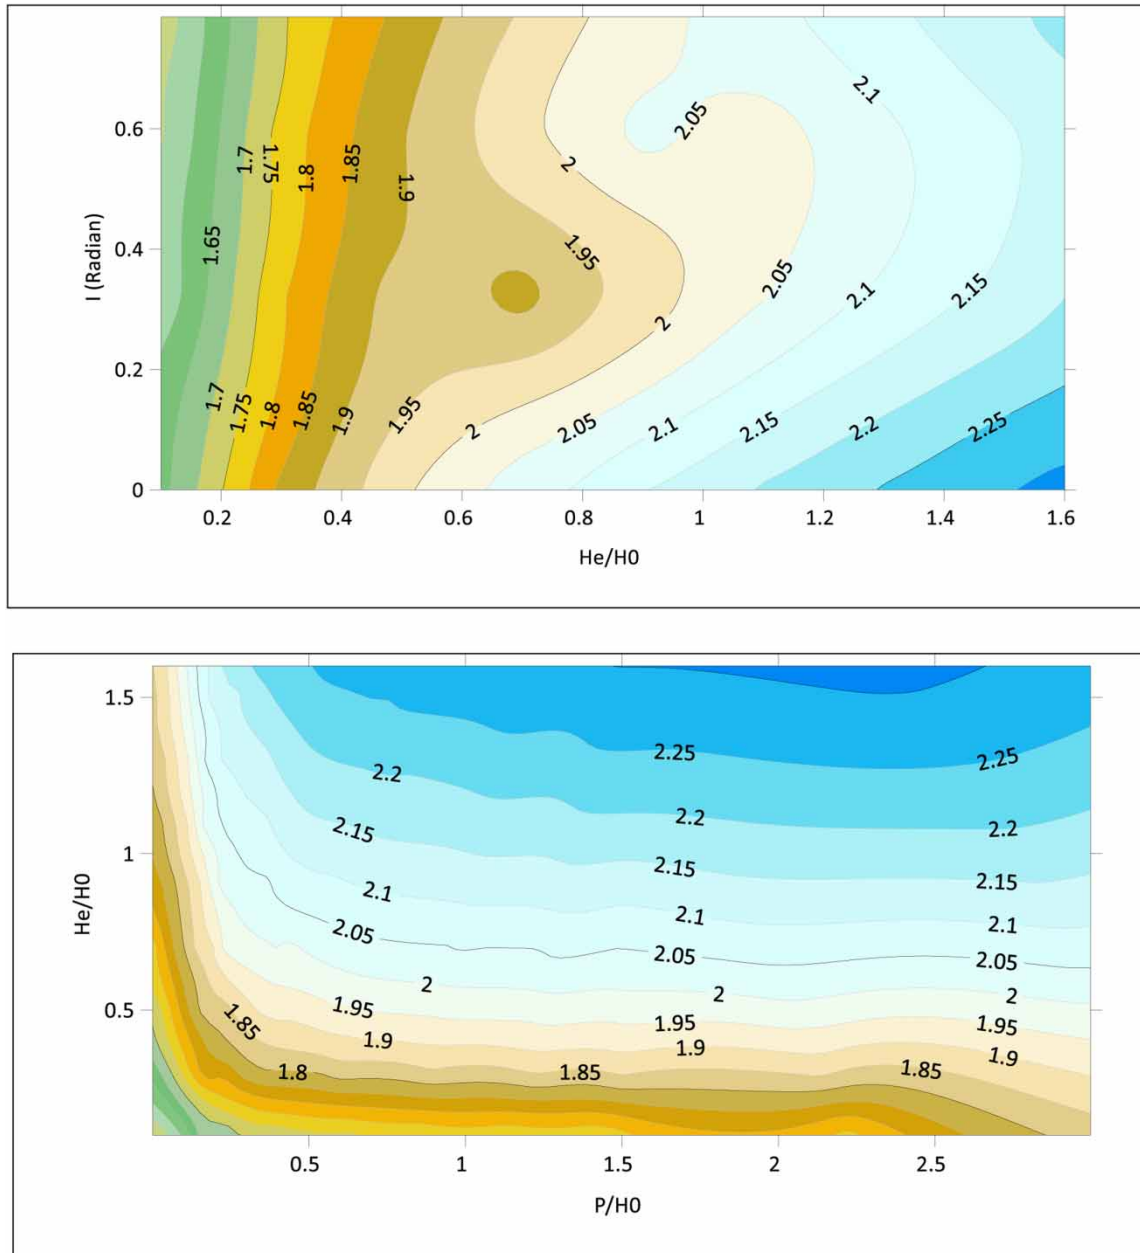

**Figure 13** | Contours for estimation of  $C_d$ .

Table 5 shows that the inclination of the upstream face-causes an increase in the discharge coefficient ( $C_d$ ). This can be seen from comparison of  $I = 0$  degrees with  $I = 25, 45$  and  $60$  degrees. The last column in Table 5 demonstrates that the ratio of  $Q_{\text{inclined}}/Q_{\text{vertical}}$  exceeds 1 for  $I$  values greater than 0.

Figure 13 provides additional information about the relation among independent variables ( $P/H_e$  and  $H_e/H_0$ )

against dependent variable  $C_d$ . These contours represent values for  $C_d$  estimation based on the 202 data points.

The relation between  $H_e/H_0$  and  $I$  shows that for a constant value of  $H_e/H_0$ , increases in  $I$  causes decreases in  $C_d$ . In addition, for a constant value for  $I$ , increasing  $H_e/H_0$  results in increases in  $C_d$ .

The relationship between  $P/H_0$  and  $H_e/H_0$  shows that for a constant value for  $P/H_0$ , increasing  $H_e/H_0$  causes an

increase in  $C_d$ . For a constant value of  $H_e/H_0$ , increasing  $P/H_0$  has no effect on  $C_d$  except for  $P/H_0 < 0.25$ .

## CONCLUSIONS

This study creates a predictive model that accurately quantifies the discharge coefficient ( $C_0$ ) from ogee weirs with upstream sloping faces and with discharge other than the design discharge. Regression analysis and GEP were carried out. Parameters such as weir upstream face inclination ( $I$ ), ratio of  $P/H_0$  that reflects weir height over the design head, and the ratio of  $H_e/H_0$  are the input variables, while discharge coefficient ( $C_0$ ) was an output. The GEP technique was more capable than regression analysis in predicting  $C_0$ . Performance errors from the preferred GEP analysis were  $R^2 = 0.995$ ,  $RMSE = 0.021$  and  $MAE = 0.015$ , while for a non-linear regression equation they were:  $R^2 = 0.702$ ,  $RMSE = 0.792$  and  $MAE = 0.803$ . Finally, examples were presented to show the application of the suggested equations. These examples accounted for 0, 25, 45 and 60 degree upstream weir slopes and included different ratios of actual heads ( $H_e/H_0$ ).

## FUNDING

There is no funding for this article.

## CONFLICT OF INTEREST

The authors declare that they have no conflict of interest.

## DECLARATIONS OF INTEREST

None.

## ACKNOWLEDGEMENTS

This research did not receive any specific grant from funding agencies in the public, commercial, or not-for-profit sectors.

## ETHICAL APPROVAL

This article does not contain any studies with human participants or animals performed by any of the authors.

## SUPPLEMENTARY MATERIAL

The Supplementary Material for this paper is available online at <https://dx.doi.org/10.2166/ws.2020.064>.

## REFERENCES

- Akbari, M., Salmasi, F., Arvanaghi, H., Karbasi, M. & Farsadizadeh, D. 2019 [Application of Gaussian process regression model to predict discharge coefficient of Gated Piano Key Weir](#). *Water Resources Management* **33** (11), 3929–3947. <https://doi.org/10.1007/s11269-019-02343-3>.
- Al-Khatib I, A. & Gogus, M. 2014 [Prediction models for discharge estimation in rectangular compound broad-crested weirs](#). *Flow Measurement and Instrumentation* **36**, 1–8. [doi.org/10.1016/j.flowmeasinst.2014.01.001](https://doi.org/10.1016/j.flowmeasinst.2014.01.001).
- Bradley, J. N. 1945 *Study of Flow Characteristics, Discharge and Pressures Relative to Submerged Dams*. Hydraulic Laboratory Rep. No. 182. US Bureau of Reclamation, Denver.
- CurveExpert Professional (2012) User guide.
- Ferreira, C. 2001a [Gene expression programming in problem solving](#). In: *6th Online World Conference on Soft Computing in Industrial Applications (Invited Tutorial)*.
- Ferreira, C. 2001b [Gene expression programming: a new adaptive algorithm for solving problems](#). *Complex Systems* **13** (2), 87–129.
- GeneXproTools (2011) Version 4.0. User manual.
- Guvan, A., Hassan, M. & Sabir, S. 2013 [Experimental investigation on discharge coefficient for a combined broad crested weir-box culvert structure](#). *Journal of Hydrology* **500** (13), 97–103. [doi:10.1016/j.jhydrol.2013.07.021](https://doi.org/10.1016/j.jhydrol.2013.07.021).
- Kim, D. G. & Park, J. H. 2005 [Analysis of flow structure over ogee spillway in consideration of scale and roughness effects by using CFD model](#). *KSCE Journal of Civil Engineering* **9**, 161–169. <https://doi.org/10.1007/BF02829067>.
- Madadi, M. R., Hosseinzadeh Dalir, A. & Farsadizadeh, D. 2014 [Investigation of flow characteristics above trapezoidal broad-crested weirs](#). *Flow Measurement and Instrumentation* **38**, 139–148. [doi:10.1016/j.flowmeasinst.2014.05.014](https://doi.org/10.1016/j.flowmeasinst.2014.05.014).
- Mohamed, H. 2010 [Flow over gabion weirs](#). *Journal of Irrigation and Drainage Engineering* **136** (8), 573–577.
- Moody, M. L. 1947 [An approximate formula for pipe friction factors](#). *Transactions of the ASME* **69**, 1005–1009.
- Salmasi, F. 2018 [Effect of downstream apron elevation and downstream submergence in discharge coefficient of ogee](#)

- weir. *ISH Journal of Hydraulic Engineering*. doi:10.1080/09715010.2018.1556125.
- Salmasi, F. 2019 Discussion of 'experimental and CFD analysis of circular labyrinth weirs'. *Journal of Irrigation and Drainage Engineering* **145** (4), 07019001. doi: 10.1061/(ASCE)IR.1943-4774.0001301.
- Salmasi, F. & Abraham, J. 2020 Discussion of 'Hydrodynamics of rectangular broad-crested Porous Weirs' by Akbar Safarzadeh and Seyed Hossein Mohajeri. *Journal of Irrigation and Drainage Engineering* **146** (4), 07020003. [https://doi.org/10.1061/\(ASCE\)IR.1943-4774.0001450](https://doi.org/10.1061/(ASCE)IR.1943-4774.0001450).
- Salmasi, F., Khatibi, R. & Ghorbani, M. A. 2012 A study of friction factor formulation in pipes using artificial intelligence techniques and explicit equations. *Turkish Journal of Engineering and Environmental Science, TUBITAK* **36**, 121–138. doi:10.3906/muh-1008-30.
- Salmasi, F., Nouri, M. & Abraham, J. 2019 Laboratory study of the effect of sills on radial gate discharge coefficient. *KSCE Journal of Civil Engineering*. **23** (5), 2117–2125. doi: 10.1007/s12205-019-1114-y.
- Savage, B. M. & Johnson, M. C. 2001 Flow over ogee spillway: physical and numerical model case study. *Journal of Hydraulic Engineering* **127** (8), 640–649. [https://doi.org/10.1061/\(ASCE\)0733-9429\(2001\)127:8\(640\)](https://doi.org/10.1061/(ASCE)0733-9429(2001)127:8(640)).
- SPSS (2013) Statistical package for social science (SPSS) software version 22.
- Tullis, B. P. 2011 Behavior of submerged ogee crest weir discharge coefficients. *Journal of Irrigation and Drainage Engineering*. **137** (10), 677–681. doi:10.1061/(ASCE)IR.1943-4774.0000330.
- Tullis, B. P. & Neilson, J. 2008 Performance of submerged ogee-crest weir head-discharge relationships. *Journal of Hydraulic Engineering* **134** (4), 486–491. doi:10.1061/(ASCE)0733-9429(2008)134:4(486).
- US Bureau of Reclamation, USBR 1987 *Design of Small Dams*. US Government Printing Office, Washington, DC.

First received 3 May 2019; accepted in revised form 31 March 2020. Available online 17 April 2020
